# Supplementary material
Source: Springer Nature journal article supplement (https://www.springermedizin.de/resource/supplementary/12885_2005_327_MOESM5_ESM.pdf/9469222)

### Secondary Follicles

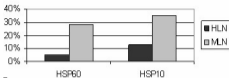

**a**

### Paracortex

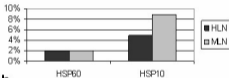

**b**

### Medullary Sinuses

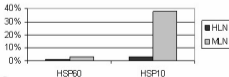

**c**

Supplement: MOESM5 [file 9469222]
